# Supplementary material
Source: HighWire-hosted journal article supplement (https://qualitysafety.bmj.com/content/31/7/526)

**Appendix 1. Characteristics of databases used in development of the Framework for PRDBs**

| <b>Dataset characteristic</b>                   | <b>IHI national survey dataset<sup>35</sup></b>   | <b>Open Notes survey dataset<sup>25</sup></b>               |
|-------------------------------------------------|---------------------------------------------------|-------------------------------------------------------------|
| Eligible survey respondents                     | 2536                                              | 22,889                                                      |
| Patient-reported errors                         | 559 (22%)                                         | 4831/22889 (21%)                                            |
| Family-reported errors                          | 475 (19%)                                         | n/a                                                         |
| Total non-trivial errors available for analysis | 1034                                              | 1749                                                        |
| Ambulatory errors                               | 416 (40%)                                         | 1749 (100%)                                                 |
| Survey setting                                  | General public – panel representing US population | Clinical: Patients reading office visit notes at 3 US sites |
| Method of survey administration                 | Online or by telephone                            | Online through the patient portal                           |
| Survey Language                                 | English or Spanish                                | English                                                     |
| Year of survey                                  | 2017                                              | 2017                                                        |

PRDB=Patient-Reported Diagnostic process-related Breakdown. Table created by the authors

## Appendix 2. The Framework for Patient-Reported Diagnostic process-related Breakdowns in ambulatory care

### I. PATIENT-REPORTED BREAKDOWN/PROBLEM:

**ACCESS TO CARE:** A problem or delay in accessing care including:

- Scheduling a medical appointment
- Getting to the appointment
- Difficulty paying for care
- Lack of interpreter
- Access, not further described

**MEDICAL HISTORY:** A problem or delay in gathering, understanding, or interpreting the medical history, including:

- Wrong symptoms or main concern:
  - Description of symptoms, course of illness (“history of present illness”), sequence, duration, location, severity, what makes symptoms better or worse
  - Discrepancy in symptoms or other history in one part of the note vs another
  - Incorrect location of recent care related to current problem
  - Missing or wrong interpretation of symptoms or history related to medications including:
    - History of medications: How long patient has been taking particular meds and/or description of their effects or side effects on the patient
    - Unrecognized effect or side effect of medication/unmonitored medication including medication interactions
- Inaccurate diagnostic history: Current or past diagnoses misidentified in the history; ie specific (named) conditions listed or omitted in error
  - Patient has a diagnosis that is missing (or not listed)
  - Patient is not aware of a diagnosis that is listed or does not have diagnosis
  - Patient has the condition but the wrong diagnosis/type is listed; ie type 1 vs type 2 diabetes
  - Billing codes (imply diagnosis that patient does not have/is not aware of)
- Inaccurate past medical history:
  - Prior medical problems or conditions (except those specifically named (see “current or past diagnosis”))
  - Dates or types of surgeries or dates of clinical course
  - Incorrect healthcare provider or healthcare facility involved in prior care
- Wrong side: The description of “right” vs “left” is incorrect (For example: “broke *right* leg,” when it was really the *left* leg.)
- Wrong patient: The information is about the wrong patient or appears to be about someone else
- Inaccurate social habits and circumstances:
  - Alcohol use, smoking, drug use or other habits
  - Patient’s or family job/employment, place of residence
  - Family members names, ages, place of residence, employment, family structure
- Inaccurate family history: Inaccurate or missing family medical conditions: especially history of cancer, diabetes, other heritable diseases
- Something important is missing
  - Incomplete information in the records or from prior organization (ie records not sent or incomplete) or missed by provider
- Inaccurate patient characteristics: Inaccurate preferred name, age, gender, sexual orientation, race, ethnicity or other such description
- Medical history, not further described

**PHYSICAL EXAM:** A problem or delay related to the physical exam, including:

- Inaccurate description of physical exam
- Documentation of parts of exam that patient perceives were not done or missing physical exam
- Physical Exam, not further described

**TESTS AND REFERRALS:** A problem or delay in planning, completing, interpreting or communicating about medical tests, results, diagnostic procedures or referrals, including:

- Ordering/scheduling:
  - Wrong test or referral ordered
  - Delayed test or referral: delay in ordering test or in getting appointment/test/procedure due to system issue, such as lack of necessary paperwork to obtain recommended tests
- Completing:
  - Problem or delay completing tests or referrals
- Follow up/Interpreting:
  - Test results not viewed or followed up
  - Healthcare provider not aware of more recent test results
  - Wrong healthcare provider receiving results/referral notes
  - Something important missing from tests, results, or referrals
- Communicating: Results not communicated appropriately to patient
- Tests/referrals, not further described

**EXPLANATION AND NEXT STEPS:** A problem or delay in explaining the symptoms in a timely manner, or communicating the explanation to the patient/family; or in communicating, coordinating, or arranging next steps, including:

- Problem or delay in reaching a final diagnosis
  - Failure to consider alternate explanations of symptoms or bias toward a fixed but unproven explanation such as all symptoms seen through the lens of pre-existing diagnosis (i.e., depression)
  - Disagreement between clinicians about diagnosis, or treatment resulting in confusing/conflicting information for patient/family
  - Other failure or delay, not otherwise described
- Problem or delay with communicating the diagnosis to the patient
- “Diagnosis,” not further described
  - ie Patient comment that uses the words diagnosis or misdiagnosis/misdiagnosed
- Next steps not communicated to patient or does not match patient understanding
- Something important missing from next steps or care plan
- Problem or delay of treatment (including clinician planning or coordination)
  - Wrong treatment
  - Other failures or delays related to clinician planning for next steps
  - Inadequate coordination of care between providers or between visits
- Care plan/treatment/coordination, not further described

**COMMUNICATION AND RESPECT:** A problem or delay related to communication specifically described by the patient or family, including:

- Patient not listened to/not heard Patient specifically (subjectively) states that they felt unheard

- Healthcare provider unresponsive/fails to communicate upon request
- Patient concern or knowledge dismissed, ignored, not taken seriously, not 'believed'
- Patient's request to address a perceived problem was ignored
- **Misalignment between patient and clinician about symptoms, events, or significance of these:** A mismatch between patient and provider about significance of a new or persisting problem. Misalignments may vary in degree and may not be recognized by the patient or the clinician at the time of the visit. Patient objectively states a mismatch. Although misalignment may coexist with "Patient not listened to/not heard," in some instances clinician may have listened but not remembered, etc. In other words, some patients may not report that they feel unheard, but could independently report misalignment).
  - Misalignment about problem significance or failure to address patient's main concern; for example, patient specifically reports that the description of the main problem in the note does not match their experience of illness
  - Misaligned emotional factors related to a problem, (such as patient fear of diagnostic test)
  - Misaligned memory of visit related to a problem: Something written that patient believes "did not happen at visit" such as documentation of counseling or other discussion that patient perceives did not occur
  - Lack of Shared Decision Making: Explanation of health issues, elicitation of patient preferences, integration of patient preferences in choosing next steps including note indicates that patient declined a treatment, test, or surgery, but patient disagrees
- **Lack of transparency from provider:** Lack of access to the right information at the right time
  - Lack of access to health information
  - Lack of open and honest communication (including after harmful event)
  - "Selective" documentation (litigious influences/pressures); Misrepresentation of documentation: 'if something looks like harm it does not go into the record'
- **Ineffective or inadequate communication about uncertainty to patient or between providers:** Missing or incorrect communication by or between healthcare providers related to uncertainty about diagnosis, care plan, or other aspects of care
- **Experience of disrespect:** A specific experience of disrespect with a stated or implied negative impact (ie offended) described by the patient such as being: belittled, mocked, ignored, short-changed, mistreated, manipulated, deceived, treated rudely, labeled or stereotyped (including race/ethnicity, "Young (biased as healthy)", female, on pain medications, mental health, gender non-conforming, substance abuse or mental health disorder, or other specific characteristic)
- **Communication, not further described:** Wrong or missing information related to communication that is specifically mentioned by the patient but not otherwise detailed

**OTHER BREAKDOWN POTENTIALLY RELATED TO THE DIAGNOSTIC PROCESS:** A breakdown not represented in the above categories but related to the diagnostic process; such as:

- Error stemming from copy/paste documentation
- Incorrect billing (diagnostic) code (implying a wrong diagnosis)
- Technology or telemedicine related\*: poor access, inadequate physical exam, impaired communication, or inadequate follow up
- Other breakdown related to the diagnostic process, not further described

**NOT APPLICABLE:** Patient report is not applicable due to:

- Insufficient information to categorize the breakdown
- Breakdown is not directly related to the diagnostic process such as medications/allergies or non-diagnostic procedural problems

## II. PATIENT-REPORTED CONTRIBUTING FACTORS

**CLINICIAN FACTORS:** Problem or delay in timely and/or accurate clinician evaluation due to a clinician factor such as:

- Failure to consider alternate explanation(anchoring), implicit or explicit bias
- Disagreement or miscommunication between clinicians about history, diagnosis, or treatment
- Failure to educate patient on life-threatening symptoms, and actions to take if they arise
- Lack of clinician engagement of patient or care partner in care and/or care decisions to the degree desired by patient/family
- Clinician factor, not further described

**PATIENT FACTORS:** Patient-related problem affecting access, adherence, communication, or care, such as:

- Barriers to communication or speaking up
- Power hierarchy, fear of judgment, fear of being a troublemaker
  - Too sick, anxious or confused
  - Not sure if important
  - Patient-provider relationship problem: pre-existing distrust, unmet or unrealistic expectations, or other relational challenge
- Social determinants: Language, literacy, culture, social norms and attitudes, education, employment, transportation, housing, child/elder care, cost, or other inadequate resources
- Physical barriers (i.e, experienced by persons with disabilities)
- Privacy concerns
- Prior distressing experience with healthcare, harm or medical error
- Lack of knowledge about how to escalate concerns about worsening or persistent symptoms
- Patient factor, not further described

**SYSTEMS FACTORS:** Organizational or technical factor, such as:

- Inappropriate copy/paste or use of templates
- EHR problem or glitch such as wrong or missing data due to new or updated EHR
- Problematic hospital/practice policies that prevent patients/families from completing next steps
- Insurance problem or delay
- Failure to provide access to test results, medical notes, and other relevant health information
- System factor, not further described

### III. **PATIENT-REPORTED IMPACT:**

**PATIENT ACTIVATION or MITIGATION:** Patient describes an increased level of activation, strengthened healthcare relationship, or problem resolution, such as:

- Increased patient activation or engagement as a result of the breakdown
- Positive impact on patient-healthcare provider relationship
- Mitigation of perceived breakdown

**NEGATIVE PATIENT IMPACT:** Patient describes a negative effect on care or care experience related to the perceived error, such as:

- Negative physical impact
  - Incorrect or delayed diagnosis or treatment
  - Worsening of health condition
  - Additional care, admission, or prolonged treatment required
  - Other negative impact on adherence, partnership; referral/work up/care plan
- Negative emotional or psychological impact
  - Increased worry
  - Privacy concerns
  - Frustration (i.e. failed attempt to correct the problem or healthcare provider not responsive to concerns) explicitly stated or reflected in tone of the report
  - Repeated breakdown (happened more than once)
- Negative impact on patient-healthcare provider relationship; decreased trust
- Negative impact on relationships including effects on family of social interactions
- Negative financial impact including insurance, disability or legal issues
- Patient Disengagement including:
  - Hopelessness, sense of futility or overwhelm with healthcare system
  - Despair or “no meaningful change” after reporting/sharing information
- Decision to leave care/Change provider
- Negative impact, not further described

Appendix created by the authors

**Appendix 3: Inter-coder reliability testing of the PRDB framework breakdown categories in two datasets**

| Dataset    | Reliability testing across 7 breakdown categories | Kappa (95% CI)   | AC1 (95% CI)      |
|------------|---------------------------------------------------|------------------|-------------------|
| 1 (n=416)  | MD1 vs MD2 (raw data)                             | 0.84 (0.81,0.86) | 0.95 (0.95, 0.96) |
|            | Adjudicated MD vs patient coder                   | 0.85 (0.83,0.88) | 0.96 (0.95, 0.97) |
| 2 (n=1749) | MD1 vs MD2 (10% raw data)                         | 0.77 (0.73,0.81) | 0.93 (0.92,0.94)  |
|            | MD vs patient coder                               | 0.64 (0.62,0.66) | 0.89 (0.89,0.90)  |

PRDB=Patient-Reported Diagnostic process-related Breakdowns. Table created by the authors.

## Appendix 4: How clinicians and systems can help avoid patient-reported ambulatory diagnostic pitfalls: Six features of strong patient-provider diagnostic teams

Figure created by the authors.

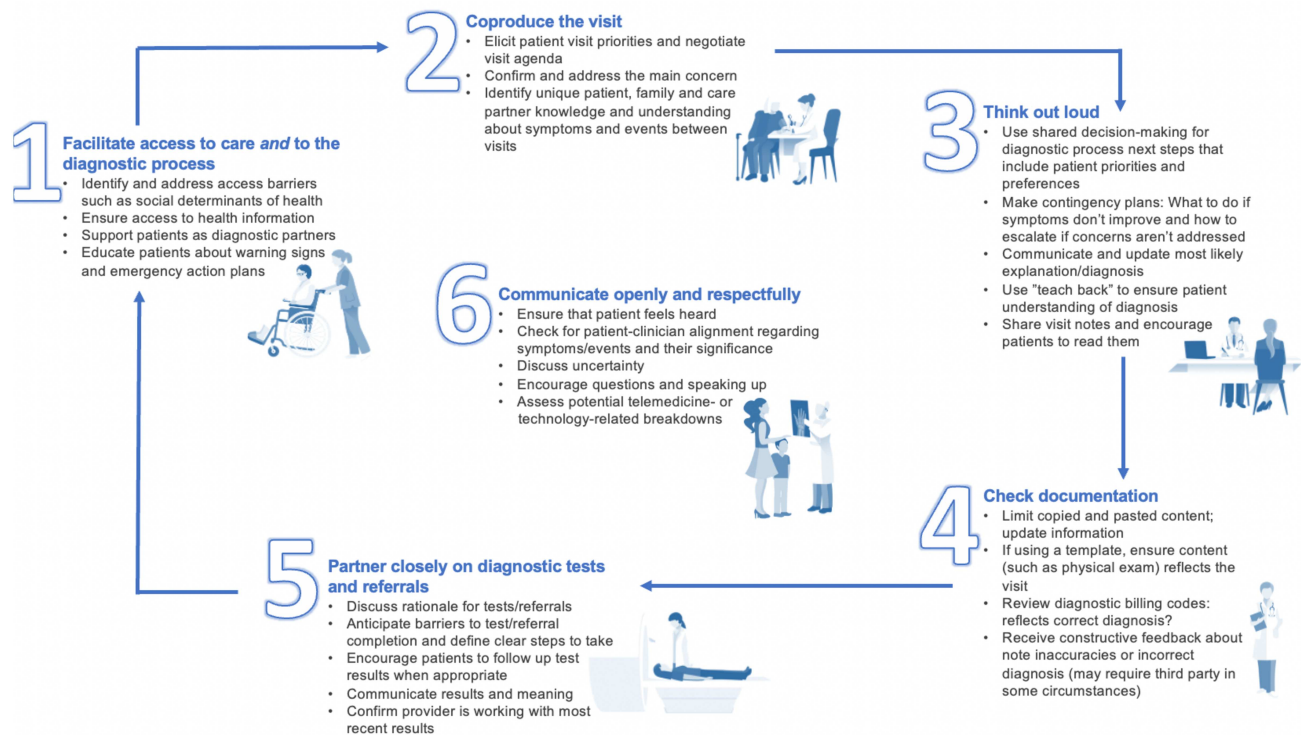

Supplement: inline-supplementary-material-1 [file inline-supplementary-material-1.pdf]
